# Supplementary material
Source: Springer Nature journal article supplement (https://www.springermedizin.de/resource/supplementary/12879_2012_2198_MOESM2_ESM.pdf/9443834)
Supplement: MOESM2 [file 9443834]

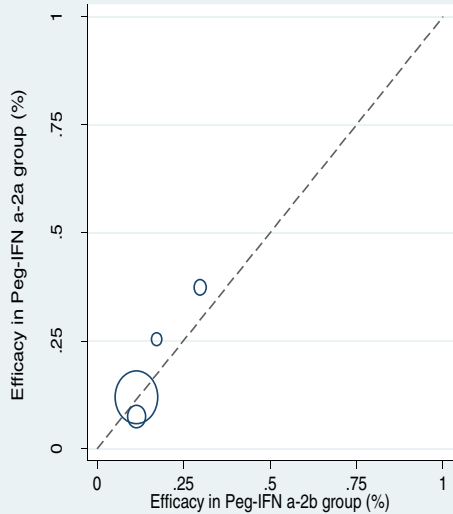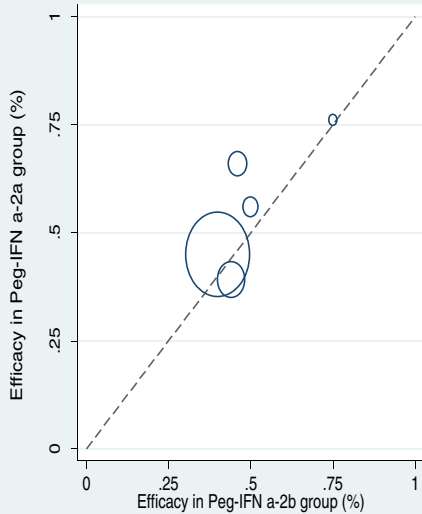

Rapid Virological Response

Early Virological Response

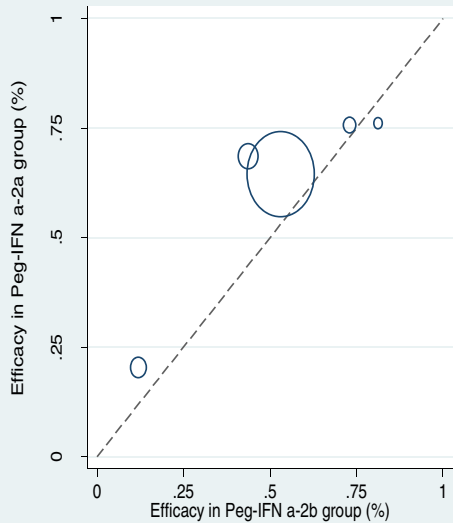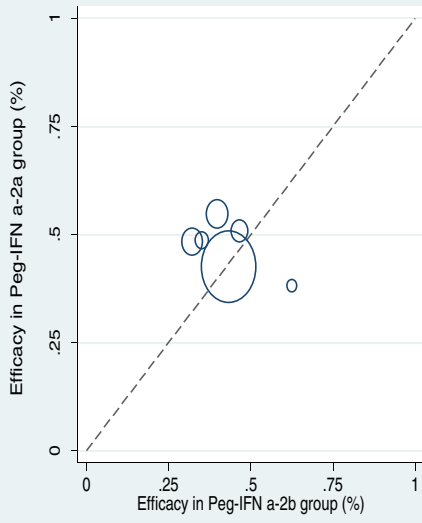

End of Treatment Response

Sustained Virological Response
